# Supplementary material for: Biocatalytic PEI–PSS membranes through aqueous phase separation: influence of casting solution pH and operational temperature
Source: Royal Society of Chemistry journal article supplement (doi:10.1039/d4sm00311j), 2024-01-01
Supplement: d4sm00311j1.pdf [file d4sm00311j1.pdf]

Electronic Supplementary Material (ESI) for Soft Matter.  
This journal is © The Royal Society of Chemistry 2024

## Supplementary Information

### Biocatalytic PEI-PSS membranes through aqueous phase separation: influence of casting solution pH and operational temperature

Lijie Li,<sup>a,b</sup> Muhammad Irshad Baig,<sup>b</sup> Wiebe M. de Vos<sup>b</sup> and Saskia Lindhoud\*<sup>a</sup>

<sup>a</sup>Faculty of Science and Technology, Department of Molecules & Materials, MESA+ Institute for Nanotechnology, University of Twente, Enschede 7500 AE, The Netherlands.

<sup>b</sup>Department of Membrane Science and Technology, MESA+ Institute for Nanotechnology, University of Twente, Enschede 7500 AE, The Netherlands.

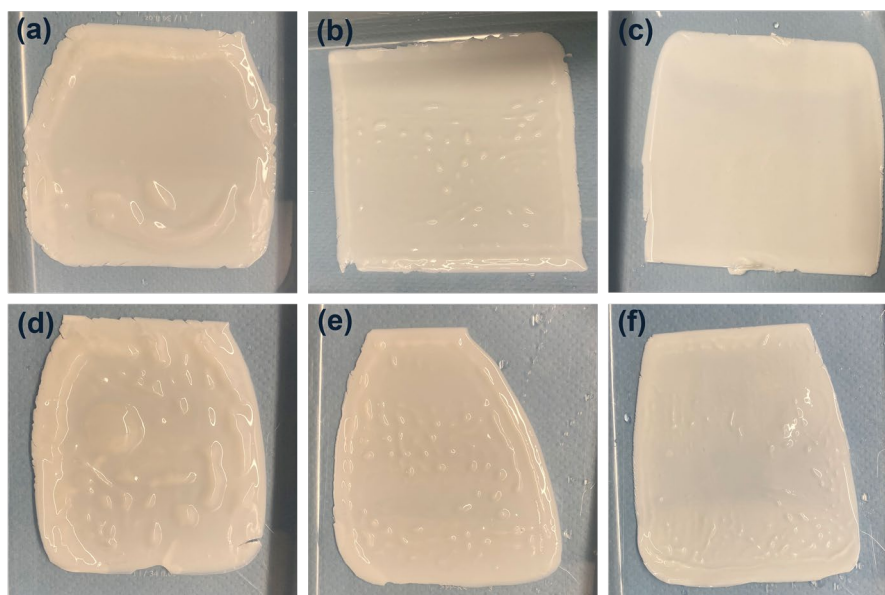

**Fig. S1** Photographs of the prepared membranes without lysozyme (a) M-pH<sub>11.4</sub>, (b) M-pH<sub>10.9</sub>, (c) M-pH<sub>10.5</sub>, and with lysozyme (d) M-L-pH<sub>11.4</sub>, (e) M-L-pH<sub>10.9</sub>, (f) M-L-pH<sub>10.5</sub>.

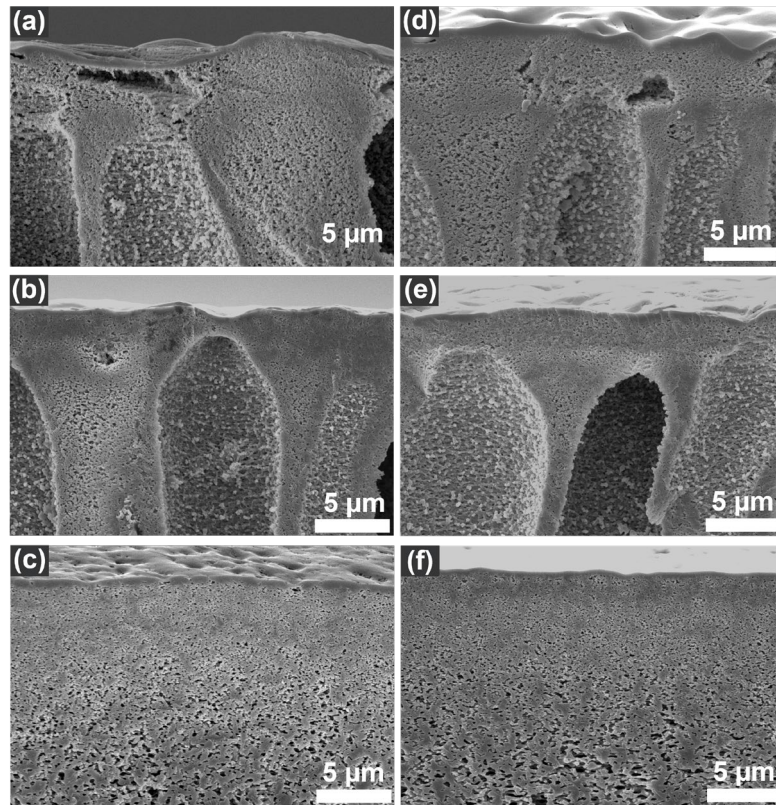

**Fig. S2** Cross-section SEM images of the PEI-PSS membranes without lysozyme (a) M-pH<sub>11.4</sub>, (b) M-pH<sub>10.9</sub>, (c) M-pH<sub>10.5</sub>, and with lysozyme (d) M-L-pH<sub>11.4</sub>, (e) M-L-pH<sub>10.9</sub>, (f) M-L-pH<sub>10.5</sub>.

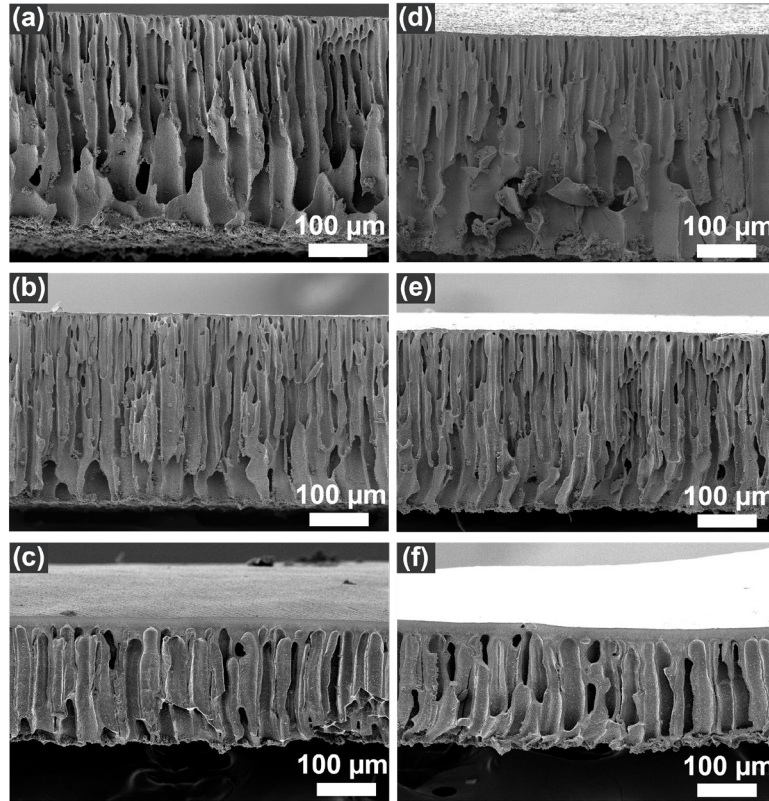

**Fig. S3** The full cross-section SEM images of the PEI-PSS membranes without lysozyme (a) M-pH<sub>11.4</sub>, (b) M-pH<sub>10.9</sub>, (c) M-pH<sub>10.5</sub>, and with lysozyme (d) M-L-pH<sub>11.4</sub>, (e) M-L-pH<sub>10.9</sub>, (f) M-L-pH<sub>10.5</sub>.

### Porosity calculation

The porosity ( $\epsilon$ ) of the membrane is calculated using the Equation S1:

$$\epsilon(\%) = \frac{V_{pore}}{V_{total}} * 100 = \left(1 - \frac{V_{pure}}{V_{total}}\right) * 100 = \left(1 - \frac{m_{pure}/\rho_{pure}}{s*h}\right) * 100$$

Where  $m_{pure}$  and  $\rho_{pure}$  is the dry weight and density ( $1.1 \text{ g}\cdot\text{cm}^{-3}$ ) of the pure dry membrane without pores. Here we assume that the density of the pure membrane is similar with the polyelectrolyte complexes.<sup>1</sup>  $s$  and  $h$  are the surface area and thickness (measured from SEM images in Fig.S3) of the dry membrane.

**Table S1.** Porosity of the membranes prepared with different pH casting solution.

| Membranes    | M-pH <sub>11.4</sub> | M-pH <sub>10.9</sub> | M-pH <sub>10.5</sub> | M-L-pH <sub>11.4</sub> | M-L-pH <sub>10.9</sub> | M-L-pH <sub>10.5</sub> |
|--------------|----------------------|----------------------|----------------------|------------------------|------------------------|------------------------|
| Porosity (%) | 81.4                 | 78.7                 | 67.1                 | 81.8                   | 77.1                   | 66.0                   |

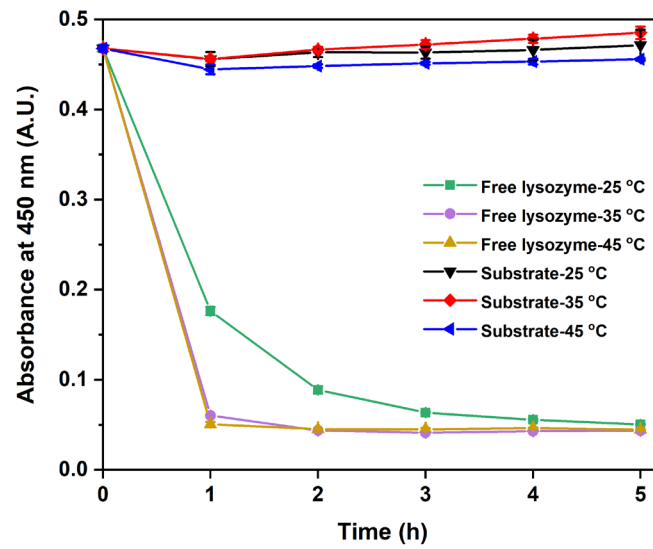

**Fig. S4** Absorbance at 450 nm of 2.5 mL substrate suspension with 100  $\mu$ L free lysozyme solution ( $5 \text{ mg}\cdot\text{L}^{-1}$ ) and 100  $\mu$ L PBS buffer (blank sample) measured at different temperatures.

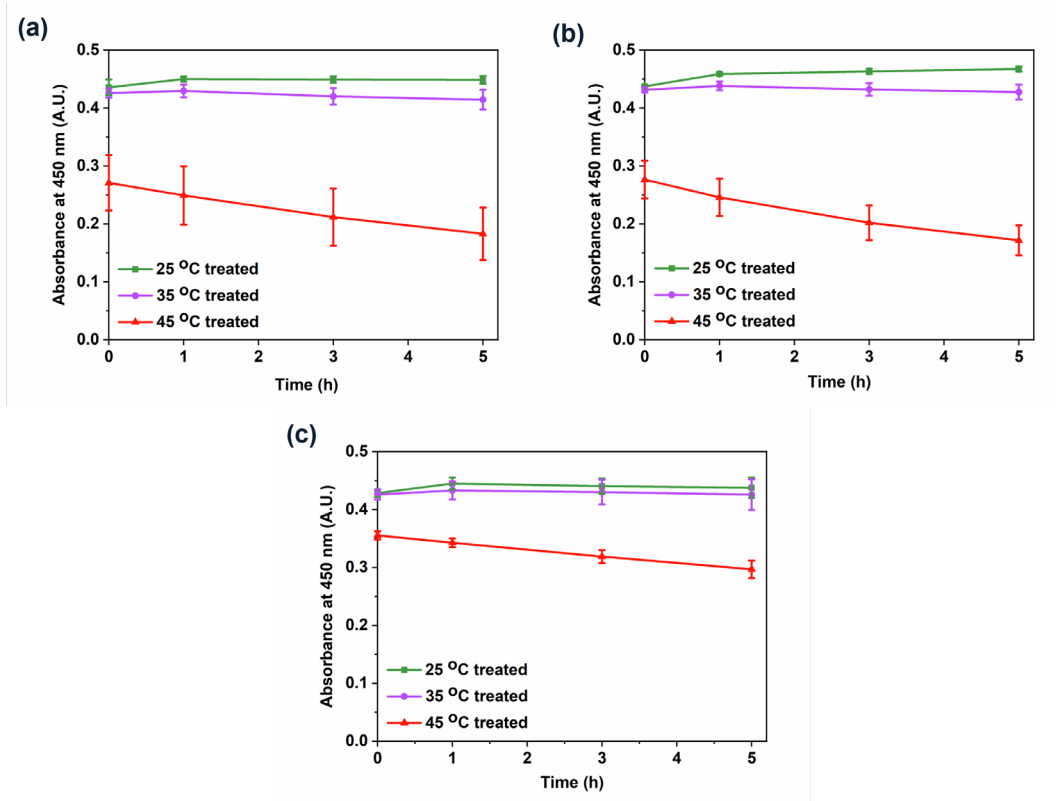

**Fig. S5** Absorbance at 450 nm of the substrate suspension after the biocatalytic membranes (a) M-L-pH<sub>11.4</sub>, (b) M-L-pH<sub>10.9</sub>, and (c) M-L-pH<sub>10.5</sub> were treated in the suspension for 1 hour at different temperatures. All values are shown as averages of three samples, and the error bar represents the standard deviation.

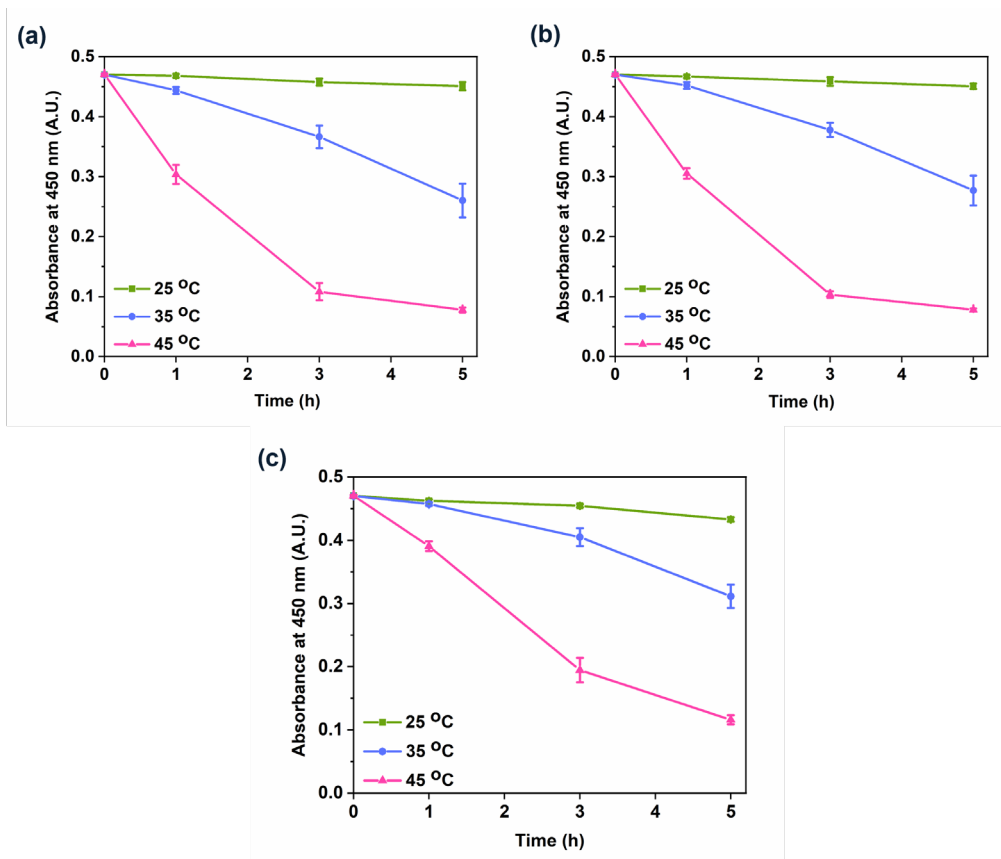

**Fig. S6** Enzymatic activity of the biocatalytic membranes (a) M-L-pH<sub>11.4</sub>, (b) M-L-pH<sub>10.9</sub>, and (c) M-L-pH<sub>10.5</sub> after being treated in substrate for 1 hour at different temperatures, and then put in new 0.15 mg·mL<sup>-1</sup> substrate suspension.

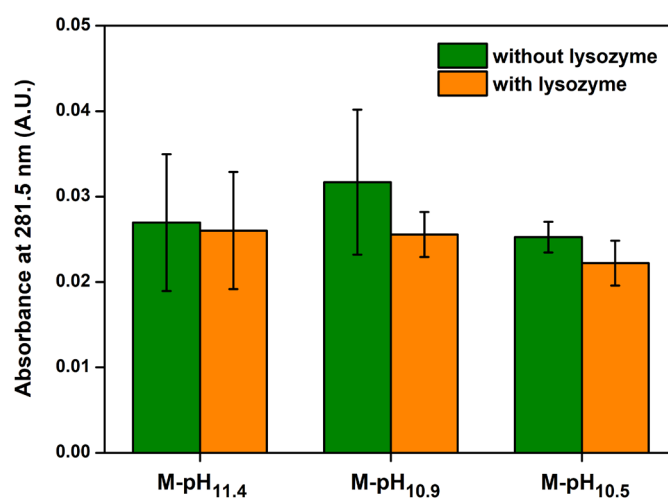

**Fig. S7** Absorbance at 281.5 nm of the supernatant water of the PEI-PSS membranes without and with lysozyme stored in water for 7 days.

**Table S2.** Overview comparison between the biocatalytic PEI-PSS and PAH-PSS membranes.

| Membranes                                                                      | PAH-PSS   | M-L-pH <sub>11.4</sub> | M-L-pH <sub>10.9</sub> | M-L-pH <sub>10.5</sub> |
|--------------------------------------------------------------------------------|-----------|------------------------|------------------------|------------------------|
| Casting solution pH                                                            | pH~13     | pH~11.4                | pH~10.9                | pH~10.5                |
| Coagulation bath pH                                                            | pH~1      | pH~4                   | pH~4                   | pH~4                   |
| Water permeability<br>(L·m <sup>-2</sup> ·h <sup>-1</sup> ·bar <sup>-1</sup> ) | 12±2      | 3.6±0.2                | 50±16                  | 452±83                 |
| Lysozyme loading<br>(μg·cm <sup>-2</sup> )                                     | 4.49±0.41 | ~7.5                   | ~7.5                   | ~7.5                   |
| Highest activity (U·cm <sup>-2</sup> )                                         | 2.47±0.49 | 4.29±0.15              | 3.80±0.17              | 2.35±0.30              |
| 7 days activity (U·cm <sup>-2</sup> )                                          | 1.23±0.47 | 3.25±0.12              | 4.31±0.03              | 2.64±0.09              |
| 7 days stability                                                               | 50.2%     | 75.8%                  | 100%                   | 100%                   |
| 60 days activity (U·cm <sup>-2</sup> )                                         | \         | 1.85±0.07              | 2.67±0.07              | 1.57±0.04              |
| 60 days stability                                                              | \         | 43%                    | 62%                    | 59%                    |

## Reference

1. R. Köhler, I. Dönch, P. Ott, A. Laschewsky, A. Fery and R. Krastev, *Langmuir*, 2009, **25**, 11576-11585.
